# Supplementary material for: Functional Anatomy of the Trimer Apex Reveals Key Hydrophobic Constraints That Maintain the HIV-1 Envelope Spike in a Closed State
Source: PubMed Central journal article supplement (PMC8092198; doi:10.1128/mbio.00090-21), 2021-03-30
Supplement: mBio.00090-21-sf003.pdf [file mBio.00090-21-sf003.pdf]

# Figure S3

## A

| Cluster | Env   | Weak/restricted NABs |         |         |         |         |        | Potent/broad NABs |       |        |       |        |        | Cumulative neutralization score | Energy change ( $\Delta\Delta G$ ) |
|---------|-------|----------------------|---------|---------|---------|---------|--------|-------------------|-------|--------|-------|--------|--------|---------------------------------|------------------------------------|
|         |       | 2G12                 | sCD4    | 447-52D | 412d    | 17b     | F105   | PGT128            | PG9   | PG16   | VRC01 | PGT151 | 35O22  |                                 |                                    |
|         | WT    | 0.04                 | 7       | 9.6     | >10     | >10     | >10    | 0.001             | 0.004 | 0.002  | 0.15  | 0.0225 | 0.0825 | -                               | -                                  |
| 2       | L122A | 0.045                | 0.005** | 0.004** | 0.05**  | 0.09**  | 0.44** | 0.004*            | 0.2*  | 0.16*  | 0.46  | nt     | nt     | 13.5                            | 3.279                              |
|         | I307A | 0.05                 | 0.02**  | 0.01**  | 0.005** | 0.005** | 0.1**  | 0.03**            | 1*    | 0.5*   | 0.5*  | 0.016  | 0.085  | 15.5                            | 3.178                              |
|         | I309A | 0.04                 | 0.1**   | 0.1**   | 0.4**   | 0.1**   | 0.3**  | 0.001             | 0.009 | 0.015* | 0.04  | 0.0215 | 0.09   | 10                              | 2.138                              |
|         | F317A | 0.05                 | 0.05**  | 0.04**  | 0.05**  | 0.01**  | 0.2**  | 0.001             | 0.01* | 0.02*  | 0.02  | 0.014  | 0.08   | 11                              | 3.003                              |
| 4       | F210A | 0.05                 | 0.8**   | 0.1**   | >10     | >10     | >10    | 0.001             | 0.006 | 0.0016 | 0.25  | 0.0095 | 0.08   | 4                               | 3.952                              |
|         | I424A | 0.033                | 0.04**  | 0.006** | 3.6*    | 8       | 0.3**  | 0.0008            | 0.007 | 0.0015 | 0.22  | 0.016  | 0.11   | 6.5                             | 3.266                              |

\*p<0.05; \*\*p<0.01

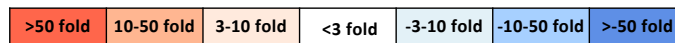

## B

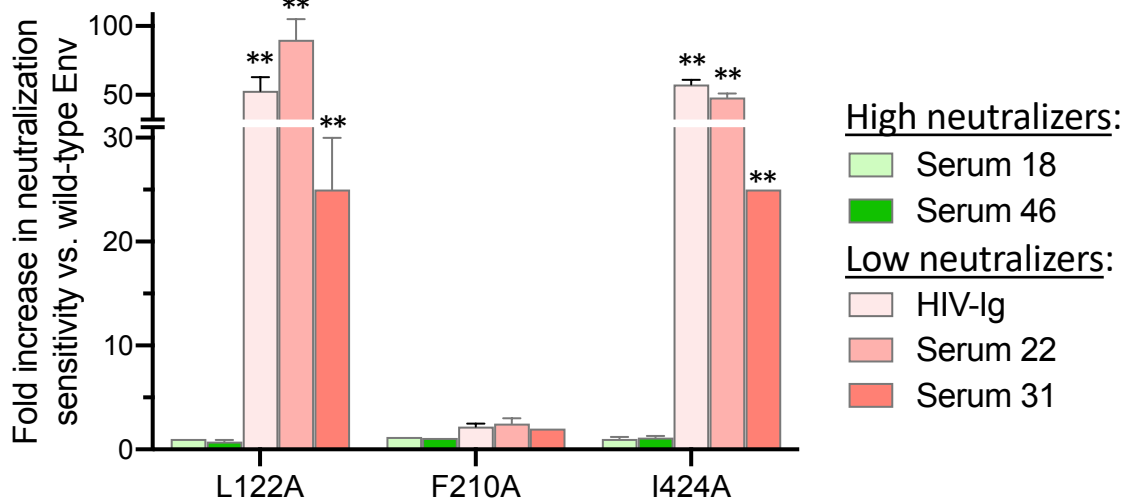

**FIG S3 Effect of individual alanine substitutions in apical hydrophobic clusters on HIV-1 JR-CSF neutralization.** Sensitivity to neutralization of HIV-1 JR-CSF wild-type (WT) and mutants bearing alanine substitutions in two apical hydrophobic clusters. (A) Sensitivity to sCD4 and a panel of human mAbs. The values denote mean half-maximal inhibitory concentrations ( $IC_{50}$ ) expressed in micrograms from duplicate experiments performed on TZM-bl target cells. The color codes indicate the fold changes (positive or negative) between the mean  $IC_{50}$  of each mutant and that of the WT Env, as specified in the legend at the bottom. The asterisks indicate p values for the statistical comparison between neutralization of each mutant and the WT Env using an unpaired two-tailed t-test (\*  $p < 0.05$ ; \*\*  $p < 0.01$ ). The trimer conformation-independent antibody 2G12 was used as a reference control. The cumulative neutralization score for each mutant was calculated as described in the manuscript and in the legend to Fig. 3. (B) Sensitivity of HIV-1 JR-CSF mutants to a sera from HIV-1 infected patients with high or low neutralization potency. The mean  $IC_{50}$  for HIV-Ig on WT HIV-1 JR-CSF was  $>50 \mu\text{g/mL}$ ; the mean half-maximal neutralization titers for the four patient sera were: 1:3600 for serum 18; 1:4800 for serum 46;  $<1:20$  for serum 22; and 1:40 for serum 31. Neutralization of mutants L122A and I424A was significantly increased ( $p < 0.01$ ), compared to the WT, for low neutralizing sera as determined using an unpaired two-tailed t-test.
