# Supplementary material for: Functional Anatomy of the Trimer Apex Reveals Key Hydrophobic Constraints That Maintain the HIV-1 Envelope Spike in a Closed State
Source: PubMed Central journal article supplement (PMC8092198; doi:10.1128/mbio.00090-21), 2021-03-30
Supplement: mBio.00090-21-sf005.pdf [file mBio.00090-21-sf005.pdf]

Figure S5 (continued)

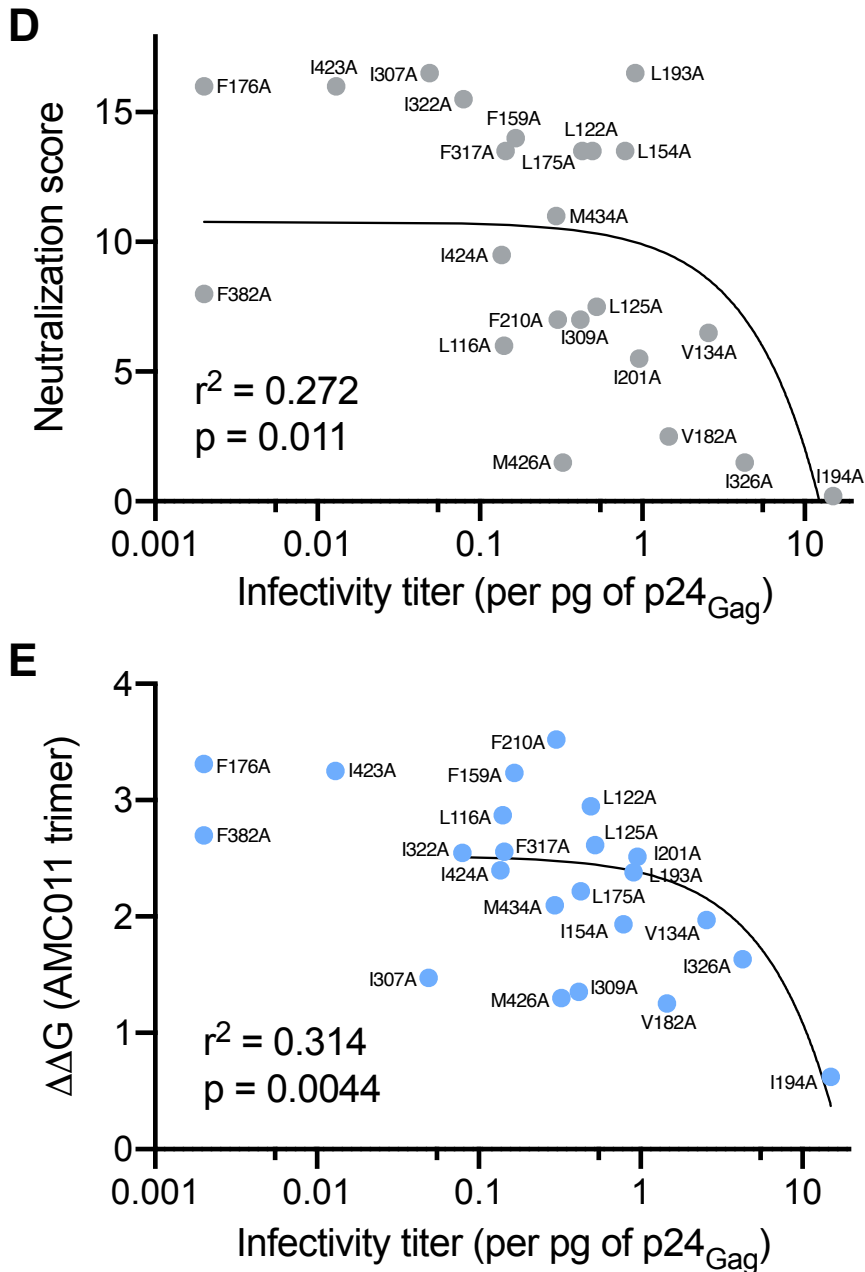

**FIG S5 Infectivity of hydrophobic cluster mutants and correlation with neutralization profile and calculated energy value.** (A) Infectivity of pseudovirus stocks of HIV-1 BaL single alanine mutants as determined by limiting dilution using the TZMbl assay. Mutations in each of the four hydrophobic clusters are highlighted by color codes: cluster 1, green; cluster 2, pink; cluster 3, blue; cluster 4, yellow-orange. (B) Correlation between infectivity and HIV-1 Gag p24 protein concentration in pseudovirus stock. The color codes are the same as in (A). No correlation was found. (C) Normalized infectivity expressed as the ratio between reciprocal infectivity titers and HIV-1 Gag p24 protein concentration from each mutant. (D) Correlation between neutralization scores and normalized infectivity titer for HIV-1 BaL mutants. (E) Correlation between *in silico* calculated  $\Delta\Delta G$  values for alanine mutations introduced into the HIV-1 AMC011 Env trimer structure and normalized infectivity titer for HIV-1 BaL mutants.
